# Supplementary material for: Development of a multicellular pancreatic tumor microenvironment system using patient-derived tumor cells
Source: Royal Society of Chemistry journal article supplement (doi:10.1039/c8lc00755a), 2019-01-01
Supplement: c8lc00755a3.pdf [file c8lc00755a3.pdf]

## Differential expression of nucleoside transporters

log<sub>2</sub> FC (static / TMES)   
-0.5 0.0 0.5

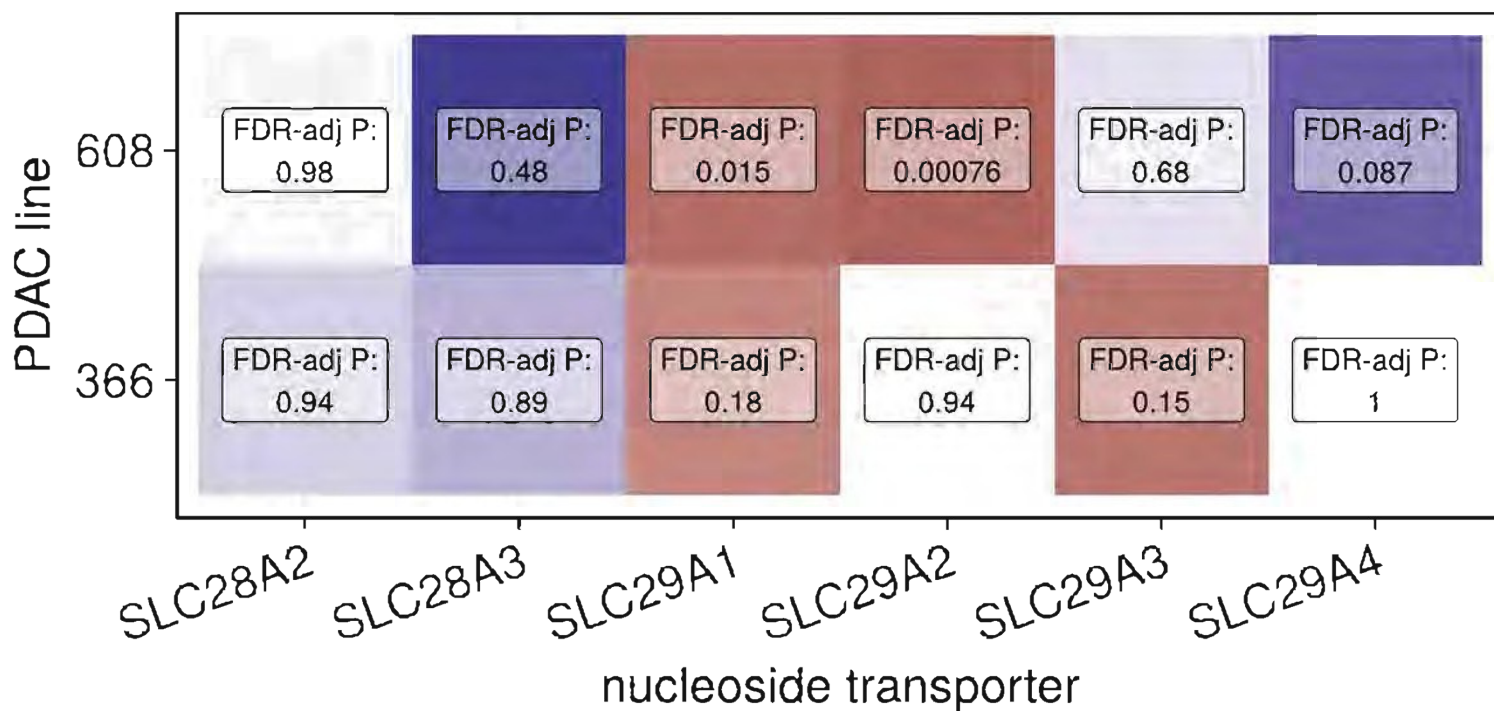

Supplemental Figure 3
