# Supplementary figures and images for: Development of a multicellular pancreatic tumor microenvironment system using patient-derived tumor cells
Source: Royal Society of Chemistry journal article supplement (doi:10.1039/c8lc00755a), 2019-01-01

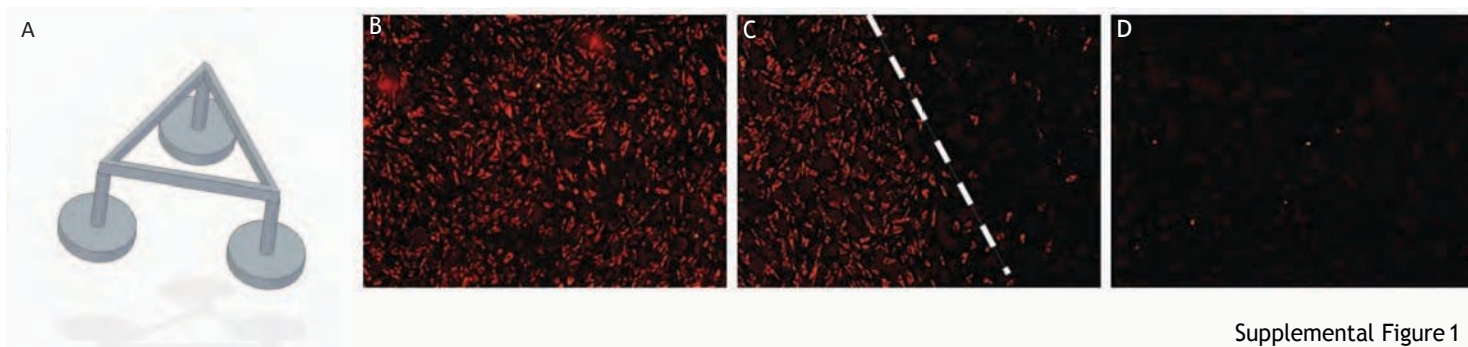

Supplemental Figure 1

Supplement: c8lc00755a1.pdf [file c8lc00755a1.pdf]

B

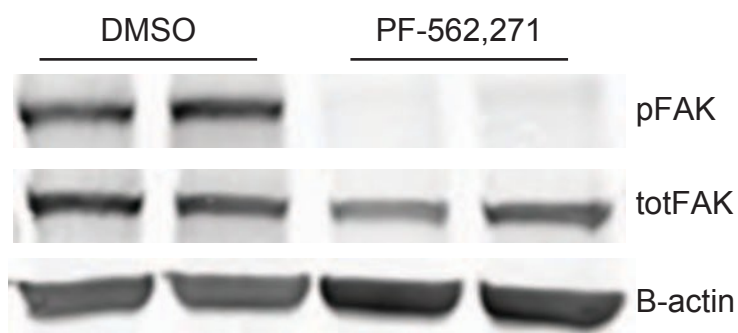

C

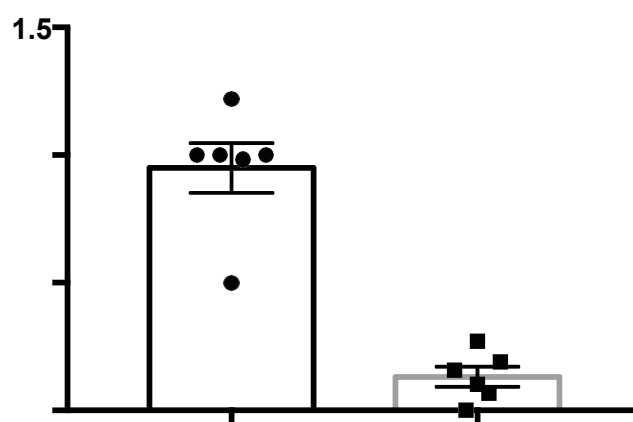

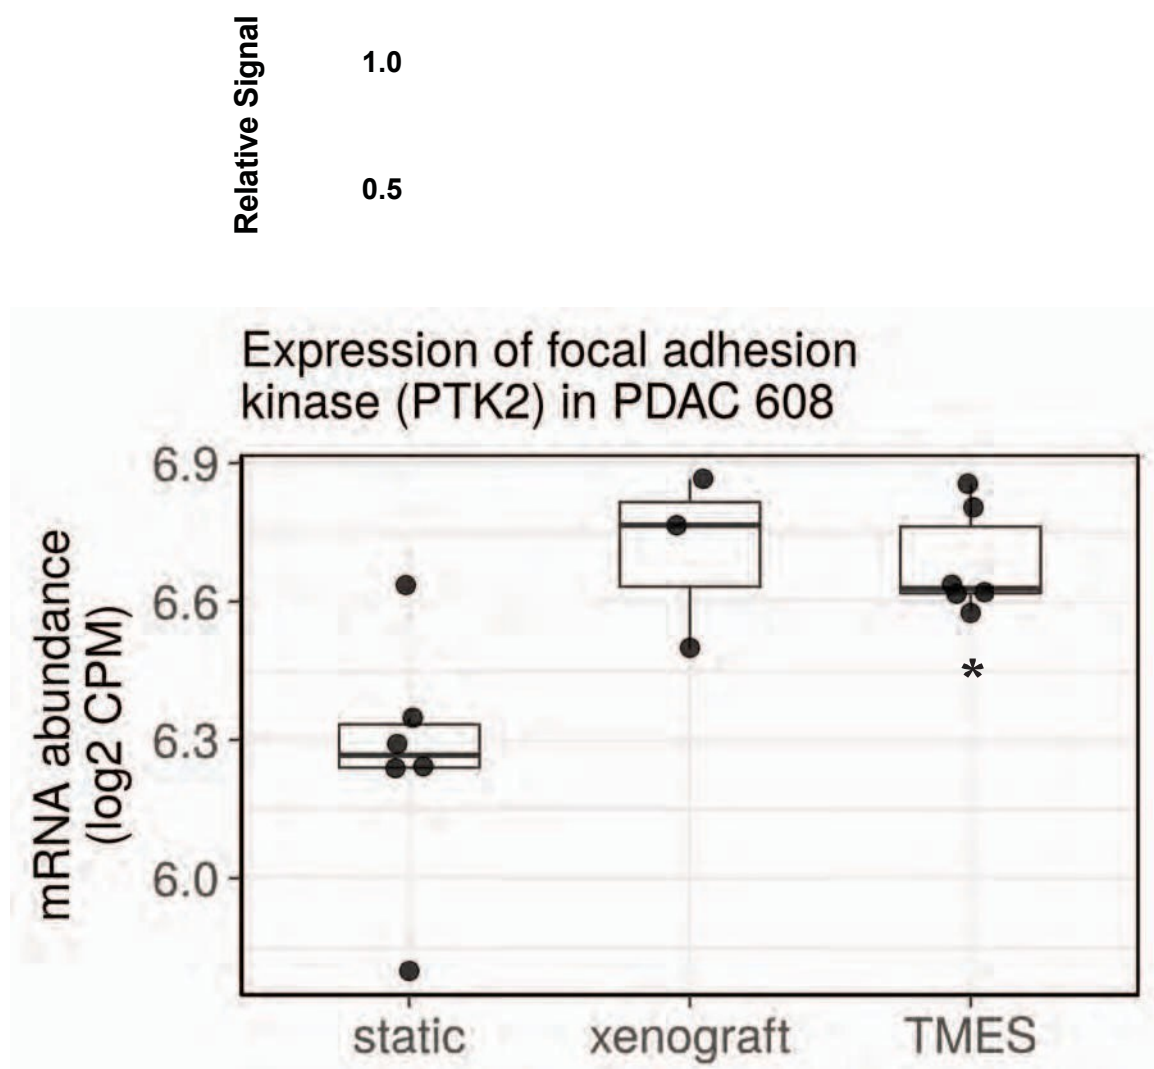

Supplemental Figure 2

Supplement: c8lc00755a2.pdf [file c8lc00755a2.pdf]
